# Supplementary material for: An X-ray detector with an ultra-low detection limit based on bulk two-dimensional perovskite PEA 2 PbBr 4 single crystals grown in HBr solution
Source: Royal Society of Chemistry journal article supplement (doi:10.1039/d4ta04726e), 2024-01-01
Supplement: d4ta04726e1.pdf [file d4ta04726e1.pdf]

## Supporting Information

### **X-ray Detector with Ultra-low Detection Limit based on Bulk Two-dimensional Perovskite $\text{PEA}_2\text{PbBr}_4$ Single Crystals Grown in HBr Solution**

Hao Dong<sup>a,b†</sup>, Xin Liu<sup>b,c†</sup>, Hu Wang<sup>b,c\*</sup>, Zhilong Chen<sup>b,d</sup>, Fenghua Li<sup>b,c</sup>,  
Pengxiang Wang<sup>b,c</sup>, Jie Fu<sup>a,b</sup>, and Yuchuan Shao<sup>a,b,c,e\*</sup>

<sup>a</sup>School of Microelectronics, Shanghai University, Shanghai 201899, China

<sup>b</sup>Laboratory of Thin Film Optics, Shanghai Institute of Optics and Fine Mechanics, Chinese Academy of Sciences, Shanghai 201800, China

<sup>c</sup>Center of Materials Science and Optoelectronics Engineering, University of Chinese Academy of Sciences, Beijing 100049, China

<sup>d</sup>Key Laboratory for Ultrafine Materials of Ministry of Education, Shanghai Engineering Research Center of Hierarchical Nanomaterials, School of Materials Science and Engineering, East China University of Science and Technology, Shanghai 200237, China

<sup>e</sup>School of Physics and Optoelectronic Engineering, Hangzhou Institute for Advanced Study, UCAS, Hangzhou 310024, China

\*Corresponding authors: {[wanghu@siom.ac.cn](mailto:wanghu@siom.ac.cn); [shaoyuchuan@siom.ac.cn](mailto:shaoyuchuan@siom.ac.cn)}

†Contributed equally.

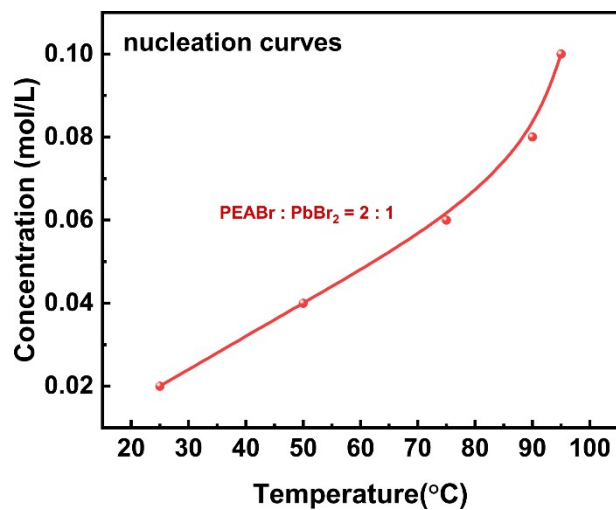

**Fig. S1.** Nucleation curve of  $\text{PEA}_2\text{PbBr}_4$  precursor with solute ratios of  $\text{PEABr}:\text{PbBr}_2 = 2:1$  in  $\text{HBr}$ .

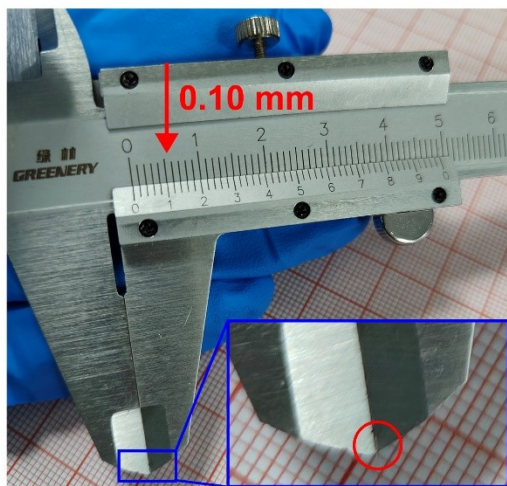

**fragile  $\text{PEA}_2\text{PbBr}_4$**

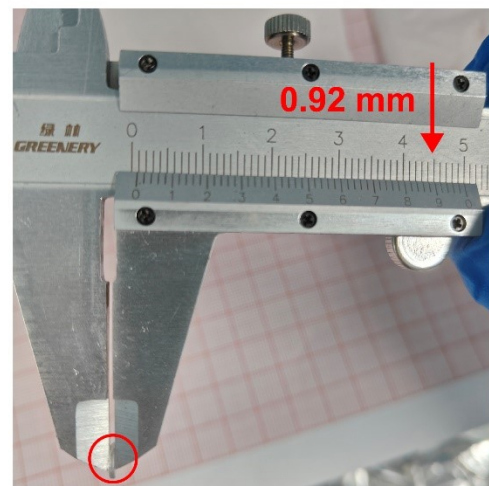

**bulk  $\text{PEA}_2\text{PbBr}_4$**

**Fig. S2.** Crystal thickness comparison of fragile and bulk  $\text{PEA}_2\text{PbBr}_4$ . The fragile  $\text{PEA}_2\text{PbBr}_4$  are grown from the precursor solution with stoichiometric ratio of  $\text{PEABr}:\text{PbBr}_2 = 2:1$ . The bulk  $\text{PEA}_2\text{PbBr}_4$  are grown from the precursor solution with stoichiometric ratio of  $\text{PEABr}:\text{PbBr}_2 = 2:3$ .

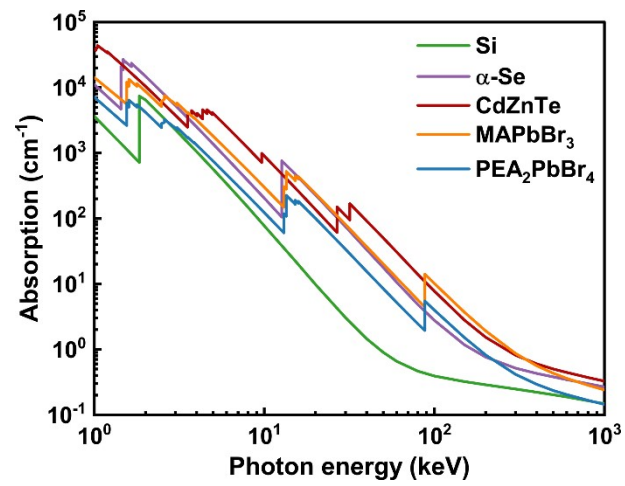

**Fig. S3.** Linear attenuation coefficients (absorption) of PEA<sub>2</sub>PbBr<sub>4</sub>, Si, α-Se, CdZnTe and MAPbBr<sub>3</sub> versus different X-ray photons energy.

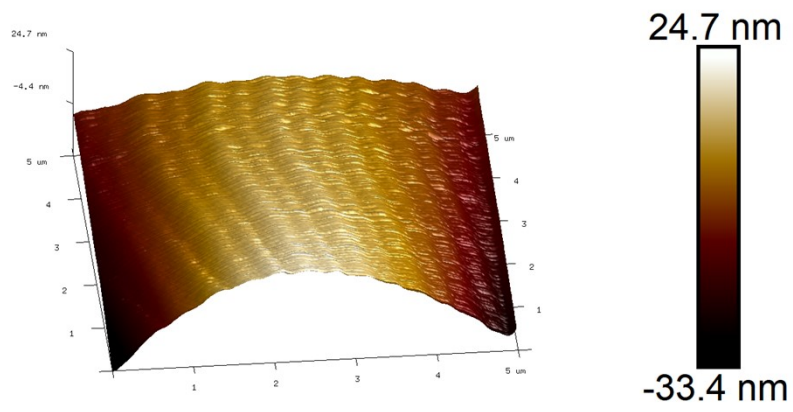

**Fig. S4.** AFM morphology images of bulk PEA<sub>2</sub>PbBr<sub>4</sub> single crystal

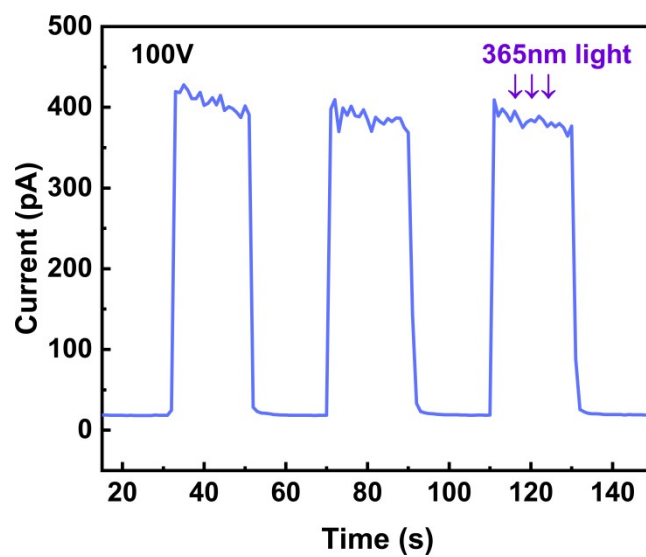

**Fig. S5.** 365 nm ultraviolet light responses of Au/PEA<sub>2</sub>PbBr<sub>4</sub>/Au. This measurement serves as a preliminary assessment to determine whether the device exhibits a valid photo response.

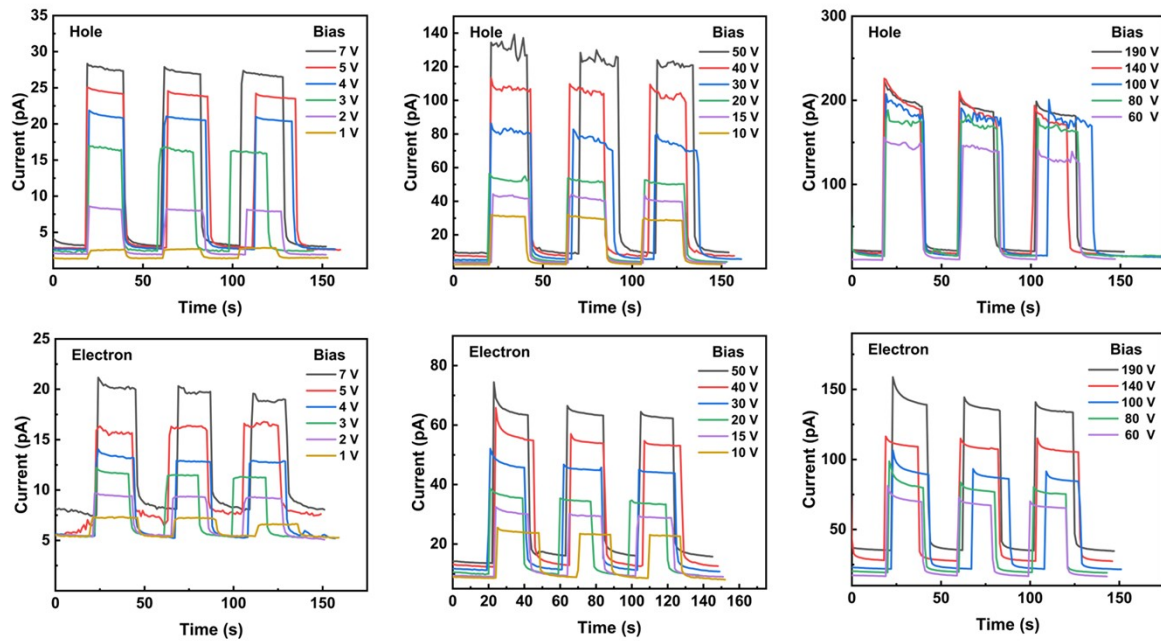

**Fig. S6.** 365 nm ultraviolet light responses ( $0.13 \text{ mW cm}^{-2}$ ) of Au/PEA<sub>2</sub>PbBr<sub>4</sub>/Au

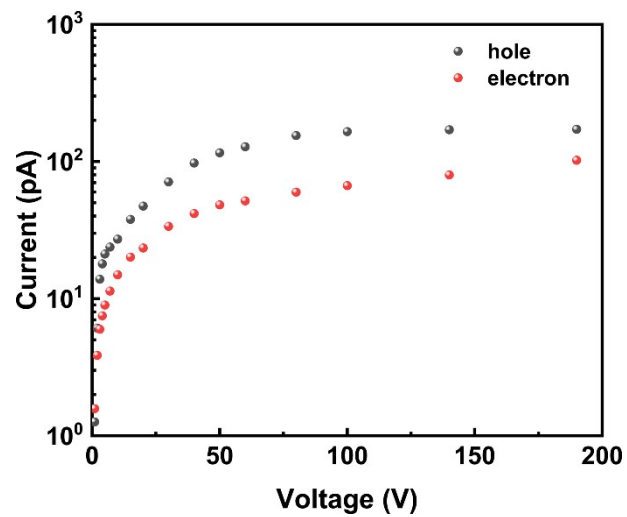

**Fig. S7.** hole and electron signal currents of Au/PEA<sub>2</sub>PbBr<sub>4</sub>/Au under 365 nm ultraviolet light



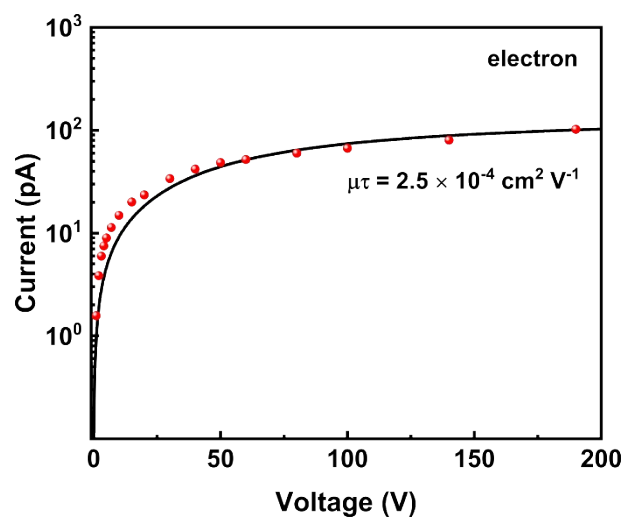

**Fig. S8.** Photoconductivity measurement for electron under  $0.13 \text{ mW cm}^{-2}$  ultraviolet LED (365 nm) illumination

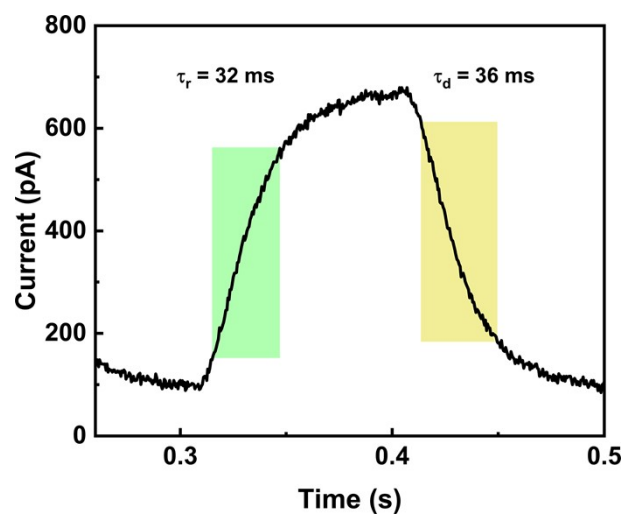

**Fig. S9.** Temporal response of Au/PEA<sub>2</sub>PbBr<sub>4</sub>/Au device under ultraviolet LED (365 nm) pulsed illumination

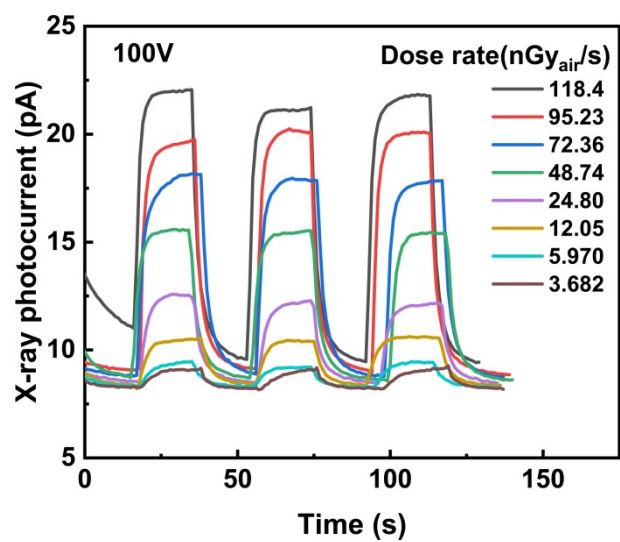

**Fig. S10.** X-ray responses of Au/PEA<sub>2</sub>PbBr<sub>4</sub>/Au with dose rates from 118.4 to 3.682 nGy<sub>air</sub> s<sup>-1</sup> at 100V

**Table S1.** Summary of performance for X-ray detectors based on 2D perovskite single crystals.

| Device structure                                                                                                                        | Crystal growth method    | Crystal Thickness [mm] | Resistivity [ $\Omega$ cm] | Noise current [nA Hz <sup>-1/2</sup> ] | $\mu\tau$ product [cm <sup>2</sup> V <sup>-1</sup> ] | Sensitivity [ $\mu$ C Gy <sub>air</sub> <sup>-1</sup> cm <sup>-2</sup> ] | Bias for sensitivity [V] | Detection limit [nGy <sub>air</sub> s <sup>-1</sup> ] | X-ray [keV] | Ref.      |
|-----------------------------------------------------------------------------------------------------------------------------------------|--------------------------|------------------------|----------------------------|----------------------------------------|------------------------------------------------------|--------------------------------------------------------------------------|--------------------------|-------------------------------------------------------|-------------|-----------|
| Au/<br>(F-PEA) <sub>2</sub> PbI <sub>4</sub> /<br>C60/BCP/Cr                                                                            | STL <sup>a)</sup> in GBL | 2                      | 1.36 ×<br>10 <sup>12</sup> | <0.25                                  | 5.1 × 10 <sup>-4</sup>                               | 3,402                                                                    | 200                      | 23                                                    | 120         | 1         |
| Au/<br>[Cu(O <sub>2</sub> C-<br>(CH <sub>2</sub> ) <sub>3</sub> -<br>(NH <sub>3</sub> ) <sub>2</sub> ]PbBr <sub>4</sub> /<br>C60/BCP/Cr | slow evaporation         | 1.2                    | 8.85 ×<br>10 <sup>11</sup> | 10 <sup>-4</sup>                       | /                                                    | 114,000                                                                  | 960                      | 56                                                    | 120         | 2         |
| Au/BA <sub>2</sub> PbBr <sub>4</sub> /Au                                                                                                | STL in HBr               | 0.16                   | 8.51 ×<br>10 <sup>11</sup> | /                                      | 1.1 × 10 <sup>-5</sup>                               | 726.18                                                                   | 150                      | 8.2                                                   | 50          | 3         |
| planar Au/<br>(PA) <sub>4</sub> AgBiBr <sub>8</sub>                                                                                     | slow evaporation         | 2.2                    | /                          | /                                      | /                                                    | 6.89                                                                     | 40                       | <5,000,00<br>0                                        | 40          | 4         |
| Au/<br>(BDA)PbI <sub>4</sub> /<br>Au                                                                                                    | STL in HI                | /                      | /                          | /                                      | 4.43 × 10 <sup>-4</sup>                              | 242                                                                      | 10                       | 430                                                   | 40          | 5         |
| Au/<br>BA <sub>2</sub> EA <sub>2</sub> Pb <sub>3</sub> Br <sub>10</sub> /<br>Au                                                         | STL in HBr               | 2                      | 4.5 × 10 <sup>10</sup>     | /                                      | 1.0 × 10 <sup>-2</sup>                               | 6,800                                                                    | 10                       | 5,500                                                 | 70          | 6         |
| Au/<br>(BA) <sub>2</sub> CsAgBiBr <sub>7</sub> /<br>Au                                                                                  | STL in HBr               | 3                      | 1.5 × 10 <sup>11</sup>     | /                                      | 1.21 × 10 <sup>-3</sup>                              | 4.2                                                                      | 10                       | /                                                     | 70          | 7         |
| planar Au/<br>(DGA)PbI <sub>4</sub>                                                                                                     | STL in HI                | /                      | /                          | /                                      | 4.12 × 10 <sup>-3</sup>                              | 4869                                                                     | 60                       | 95.4                                                  | 40          | 8         |
| Au/<br>PEA <sub>2</sub> PbBr <sub>4</sub> /Au                                                                                           | STL in HBr               | 1                      | 1.25 ×<br>10 <sup>12</sup> | 10 <sup>-5</sup>                       | 1.0 × 10 <sup>-3</sup>                               | 2998                                                                     | 100                      | 0.79                                                  | 30          | This work |

<sup>a)</sup>Abbreviations: STL, Solution temperature-lowering.

**Table S2.** Summary of detection limit for typical 3D perovskite SC X-ray detectors.

| Device structure                                                          | Detection limit<br>[nGy <sub>air</sub> s <sup>-1</sup> ] | X-ray<br>[keV] | Ref. |
|---------------------------------------------------------------------------|----------------------------------------------------------|----------------|------|
| Au/Al/BCP/C <sub>60</sub> /CsPbBr <sub>3</sub> /Au                        | 200                                                      | 30             | 9    |
| Au/MAPbI <sub>3</sub> /Au                                                 | 1.5                                                      | 22             | 10   |
| Au/MAPbBr <sub>3</sub> /C <sub>60</sub> /BCP/Ag or<br>Au                  | 500                                                      | 22             | 11   |
| Cr/MAPbBr <sub>2.94</sub> Cl <sub>0.06</sub> /C <sub>60</sub> /BCP/C<br>r | 7.6                                                      | 8              | 12   |
| Au/Cs <sub>2</sub> AgBiBr <sub>6</sub> /Au                                | 45.7                                                     | 50             | 13   |

## References

- 1 H. Li, J. Song, W. Pan, D. Xu, W. Zhu, H. Wei and B. Yang, *Adv. Mater.*, 2020, **32**, 2003790.
- 2 K. Guo, W. Li, Y. He, X. Feng, J. Song, W. Pan, W. Qu, B. Yang and H. Wei, *Angew. Chem. Int. Ed.*, 2023, **62**, e202303445.
- 3 X. Xu, Y. Wu, Y. Zhang, X. Li, F. Wang, X. Jiang, S. Wu and S. Wang, *ENERGY Environ. Mater.*, 2023, e12487.
- 4 P. Liu, Y. Xiao, Z. Yang, S. Yu and X. Meng, *Opt. Mater.*, 2022, **133**, 112972.
- 5 Y. Shen, Y. Liu, H. Ye, Y. Zheng, Q. Wei, Y. Xia, Y. Chen, K. Zhao, W. Huang and S. (Frank) Liu, *Angew. Chem. Int. Ed.*, 2020, **59**, 14896–14902.
- 6 C. Ji, S. Wang, Y. Wang, H. Chen, L. Li, Z. Sun, Y. Sui, S. Wang and J. Luo, *Adv. Funct. Mater.*, 2020, **30**, 1905529.
- 7 Z. Xu, X. Liu, Y. Li, X. Liu, T. Yang, C. Ji, S. Han, Y. Xu, J. Luo and Z. Sun, *Angew. Chem. Int. Ed.*, 2019, **58**, 15757–15761.
- 8 B. Zhang, T. Zheng, J. You, C. Ma, Y. Liu, L. Zhang, J. Xi, G. Dong, M. Liu and S. (Frank) Liu, *Adv. Mater.*, 2023, **35**, 2208875.
- 9 Z. Chen, H. Wang, F. Li, W. Zhang, Y. Shao and S. Yang, *ACS Appl. Mater. Interfaces*, 2023, **15**, 51370–51379.
- 10 Y. Song, L. Li, W. Bi, M. Hao, Y. Kang, A. Wang, Z. Wang, H. Li, X. Li, Y. Fang, D. Yang and Q. Dong, *Research*, 2020, **2020**, 2020/5958243.
- 11 H. Wei, D. DeSantis, W. Wei, Y. Deng, D. Guo, T. J. Savenije, L. Cao and J. Huang, *Nat. Mater.*, 2017, **16**, 826–833.
- 12 H. Wei, Y. Fang, P. Mulligan, W. Chuirazzi, H.-H. Fang, C. Wang, B. R. Ecker, Y. Gao, M. A. Loi, L. Cao and J. Huang, *Nat. Photonics*, 2016, **10**, 333–339.
- 13 L. Yin, H. Wu, W. Pan, B. Yang, P. Li, J. Luo, G. Niu and J. Tang, *Adv. Opt. Mater.*, 2019, **7**, 1900491.
